# Supplementary material
Source: PubMed Central journal article supplement (PMC9017357)
Supplement: aac.02105-21-s0001.pdf [file aac.02105-21-s0001.pdf]

## Supporting Information

### **A proteomic landscape of *Candida albicans* in the stepwise evolution to fluconazole resistance**

The Supporting Information includes Supplemental Materials, 11 figures as following:

#### **Supplemental Materials**

**Fig. S1.** The mass error of the whole identified peptides. (A) The mass error of the whole identified peptides. (B) Peptide length distribution.

**Fig. S2.** The repeatability of samples.

**Fig. S3.** GO-based enrichment analysis of up-regulation (red) and down-regulation (green) expressed proteins. A and B, Q1; C and D, Q2; E and F, Q3; G and H, Q4.

**Fig. S4.** KEGG-based enrichment analysis of up-regulation (red) and down-regulation (green) expressed proteins. A and B, Q1; C and D, Q2; E and F, Q3; G and H, Q4.

**Fig. S5.** Protein domain-based enrichment analysis of up-regulation (red) and down-regulation (green) expressed proteins. A and B, Q1; C and D, Q2; E and F, Q3; G and H, Q4.

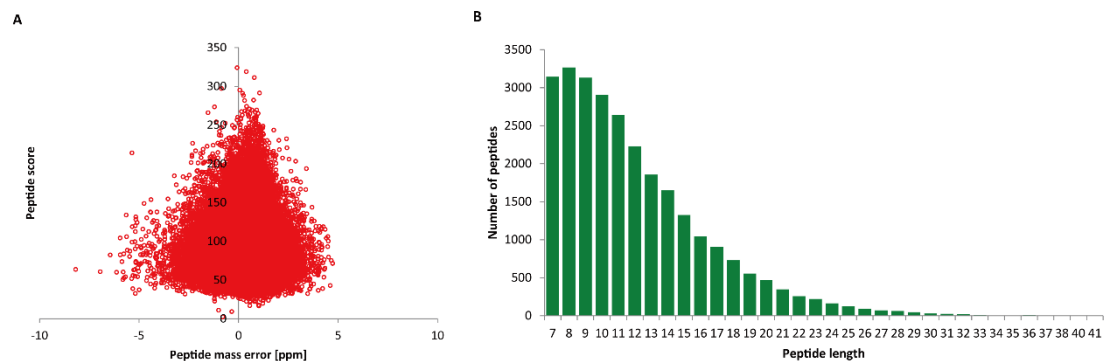

**Fig. S1.** The mass error of the whole identified peptides. (A) The mass error of the whole identified peptides. (B) Peptide length distribution.

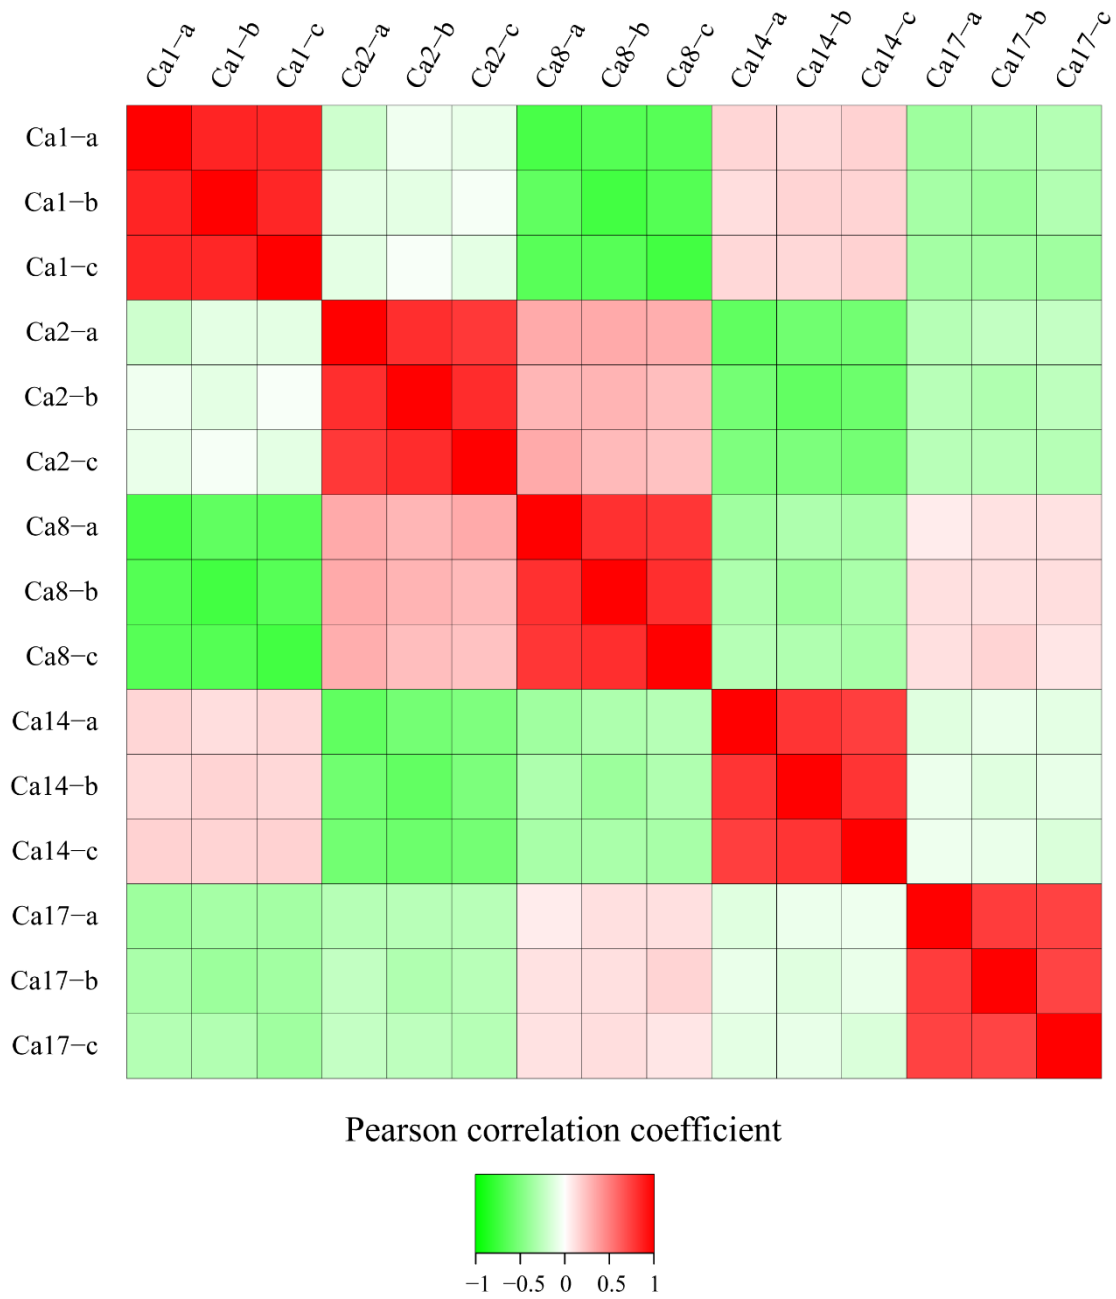

**Fig. S2.** The repeatability of samples.

A

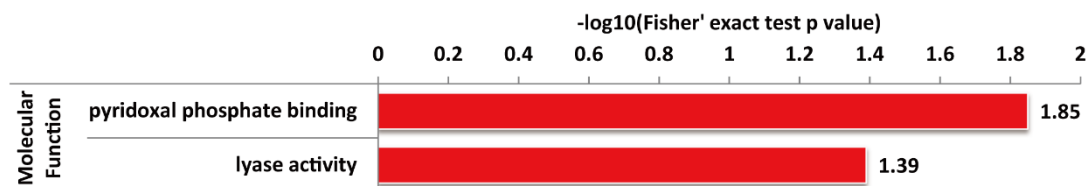

B

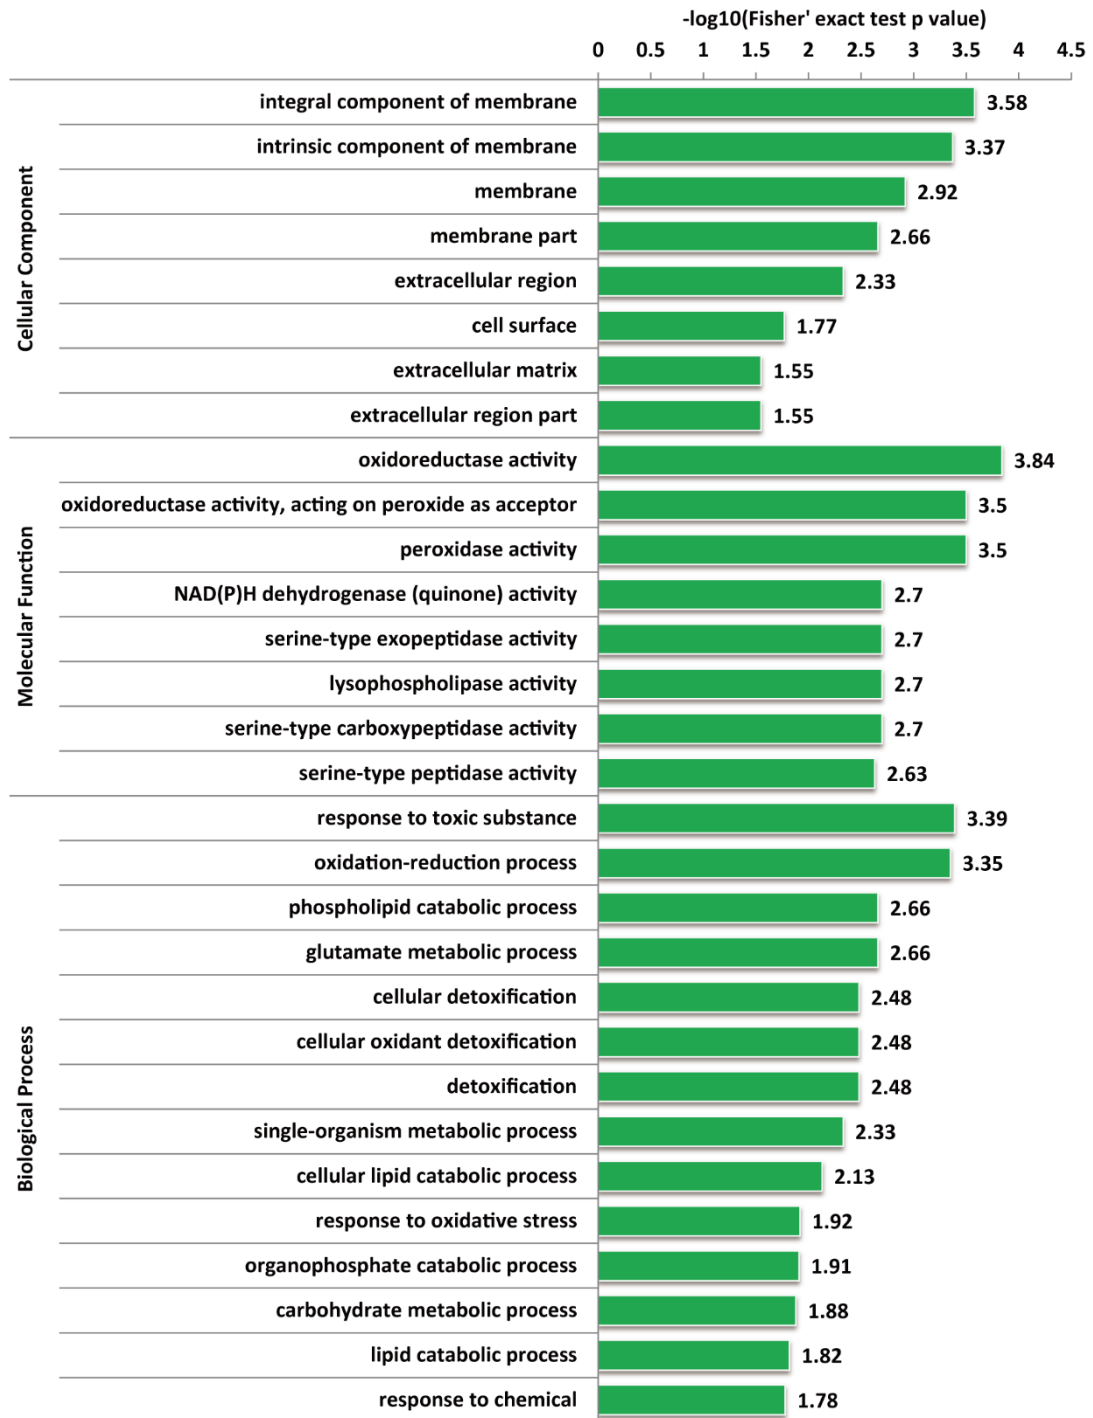

C

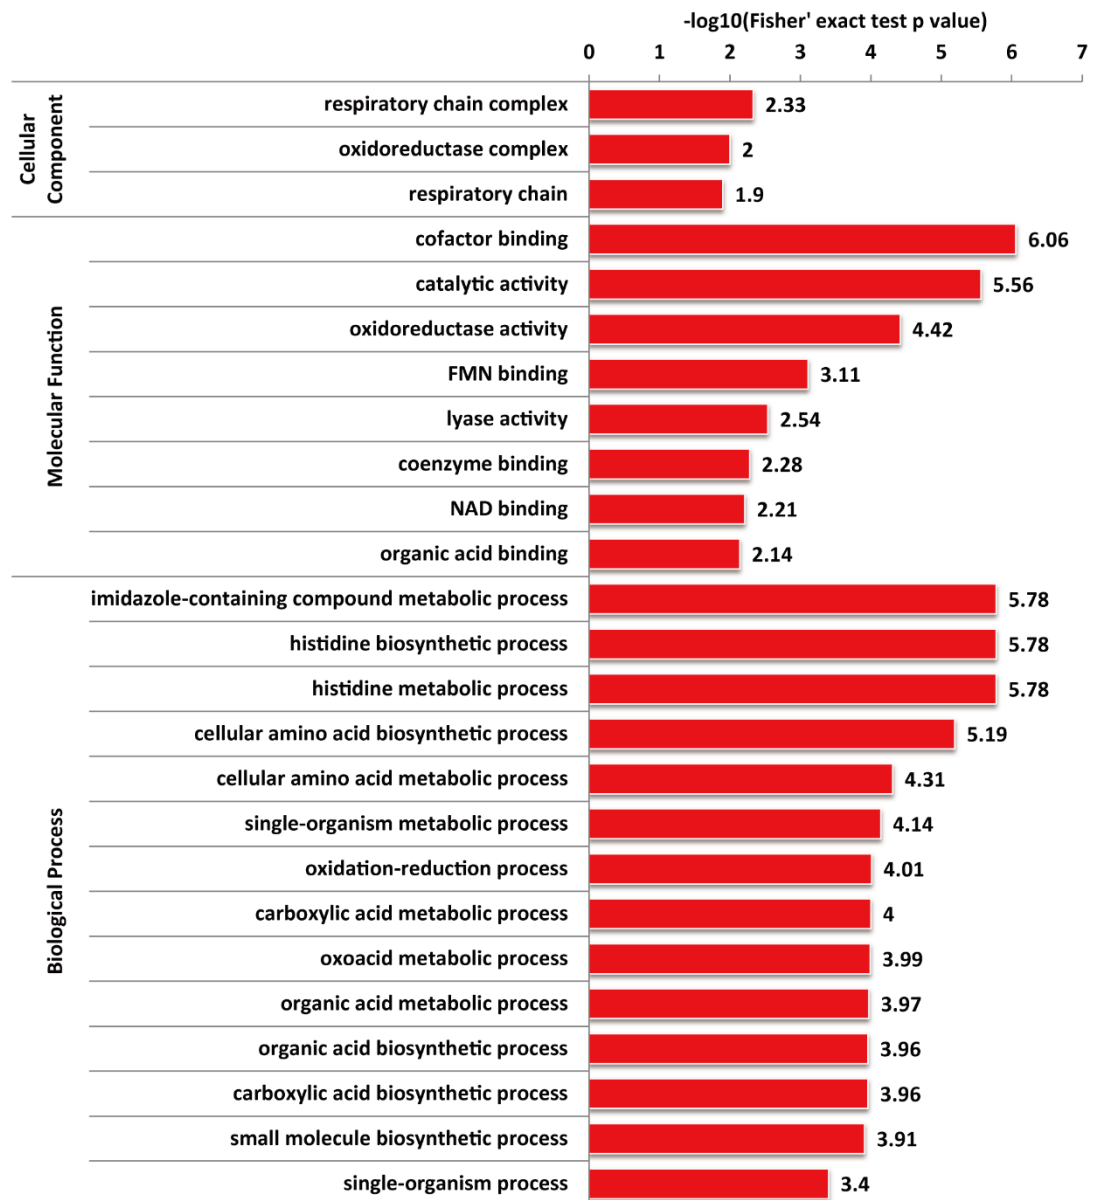

D

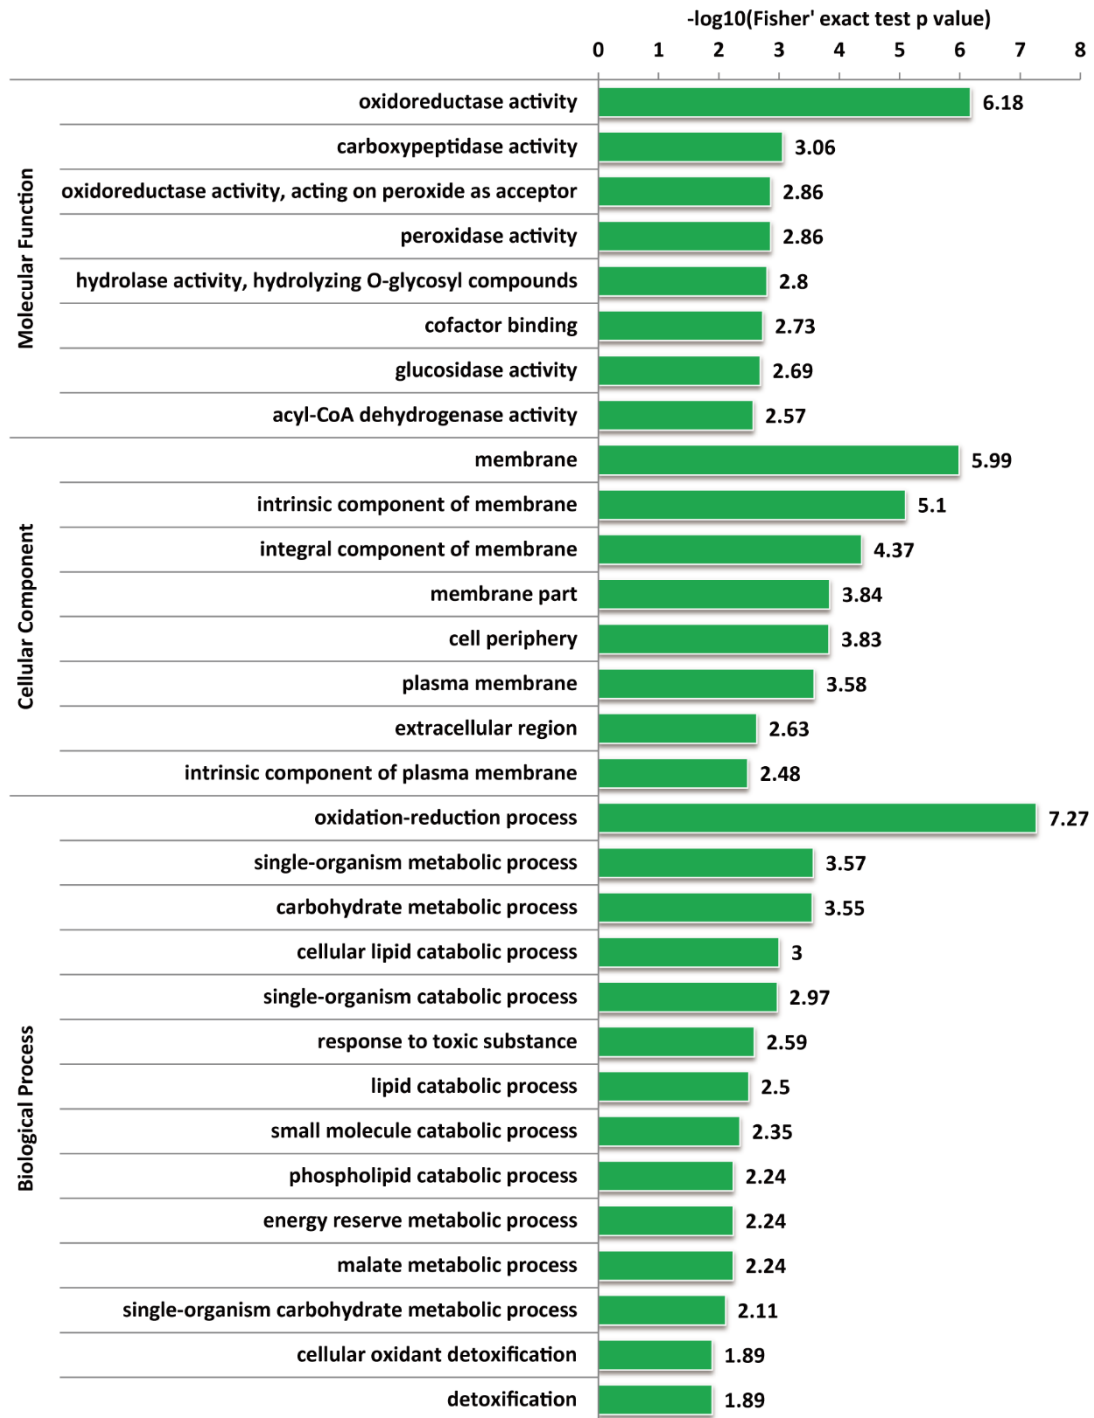

E

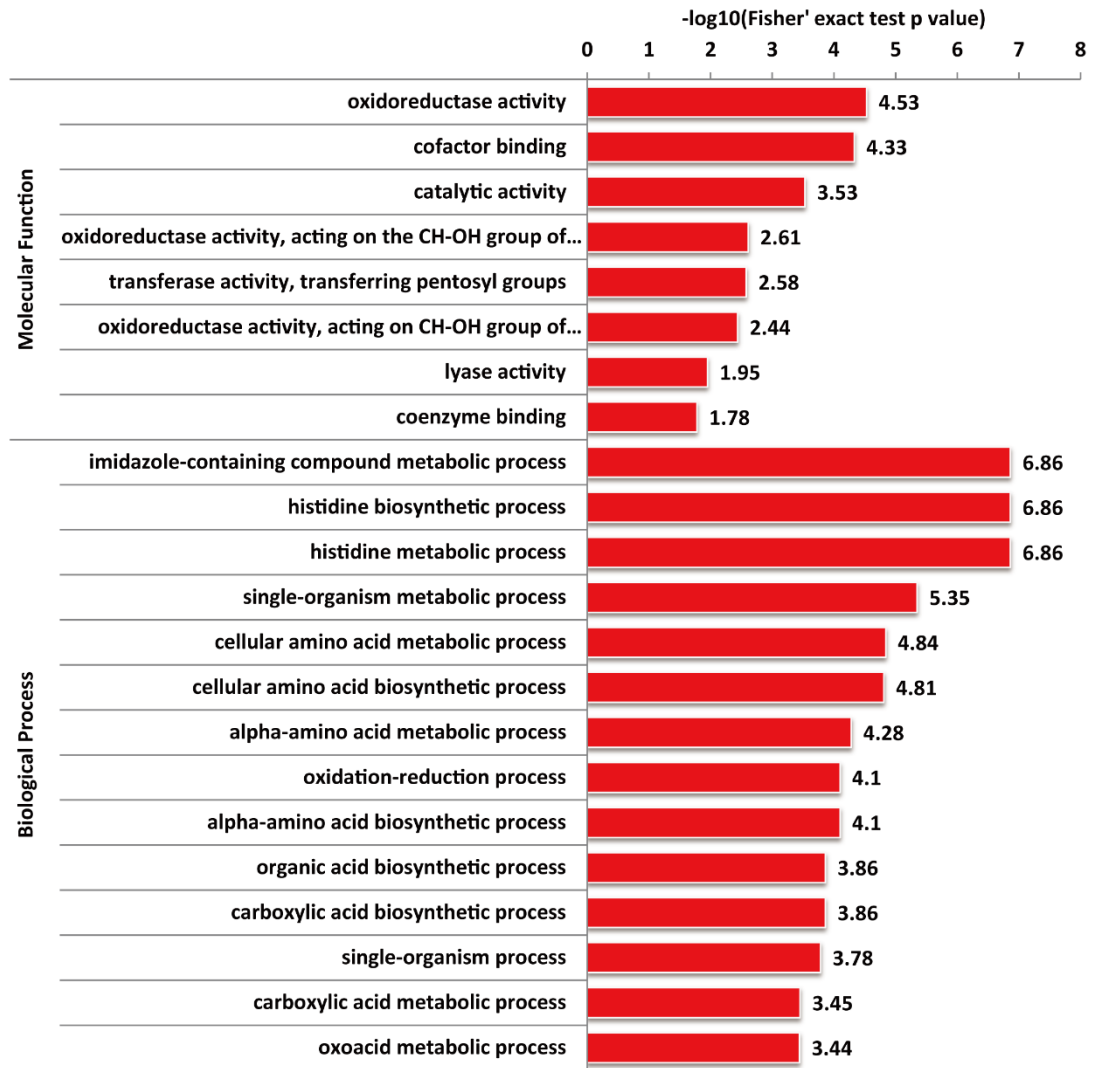

F

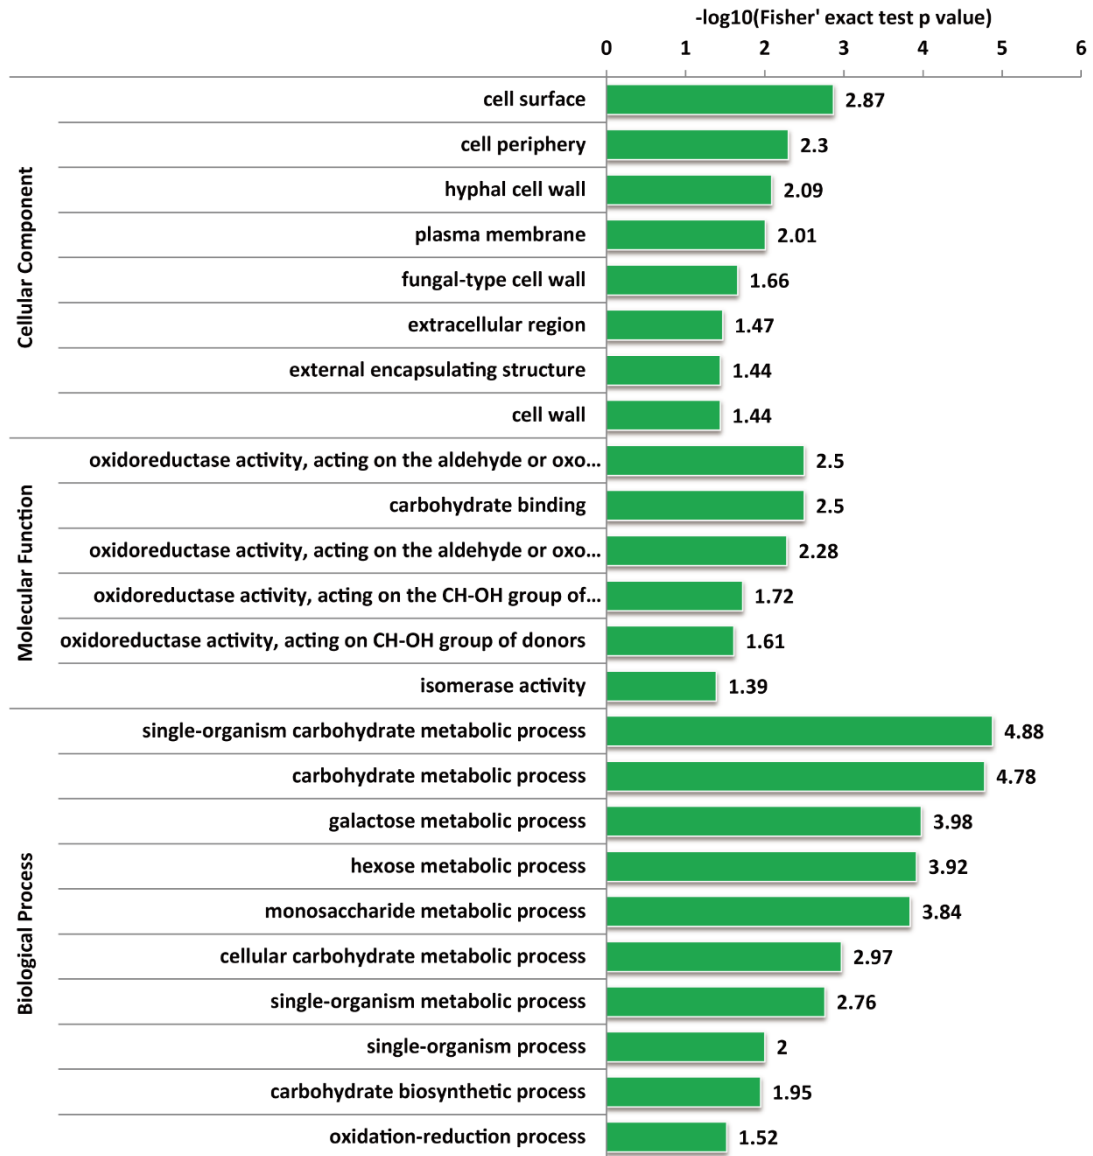

G

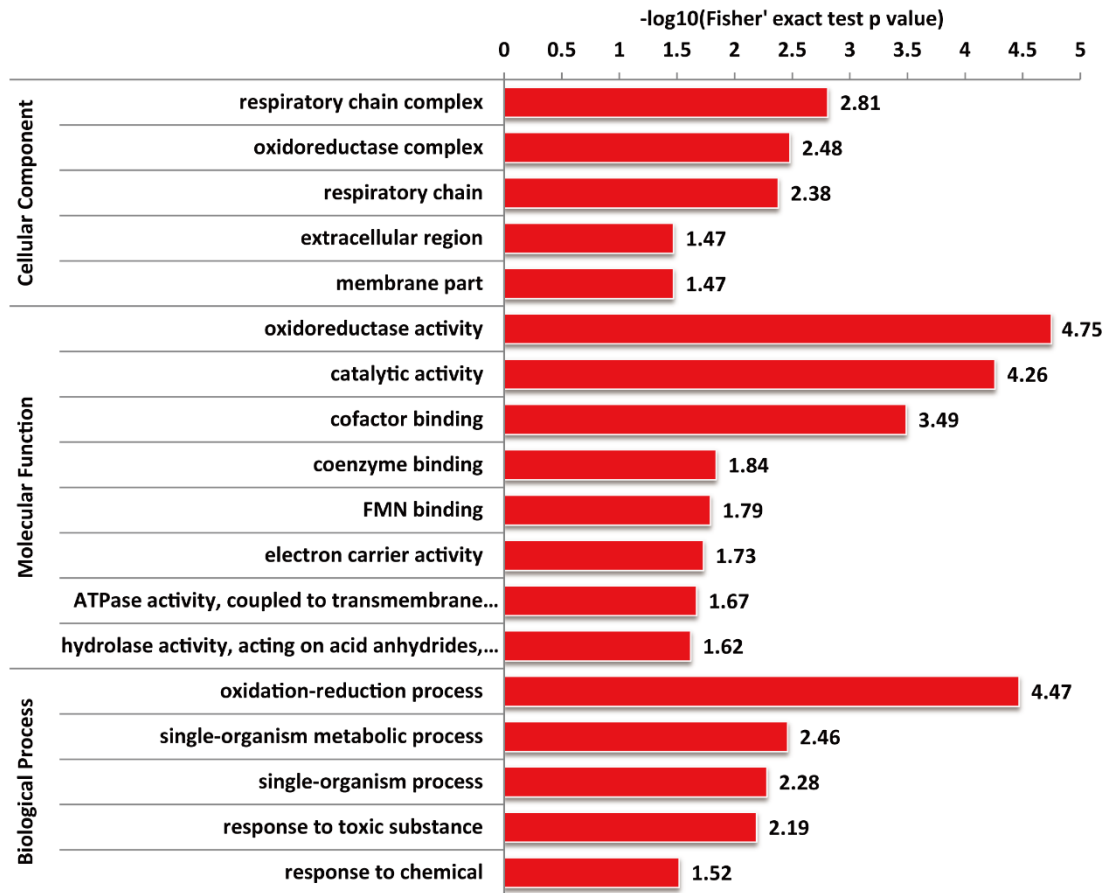



H

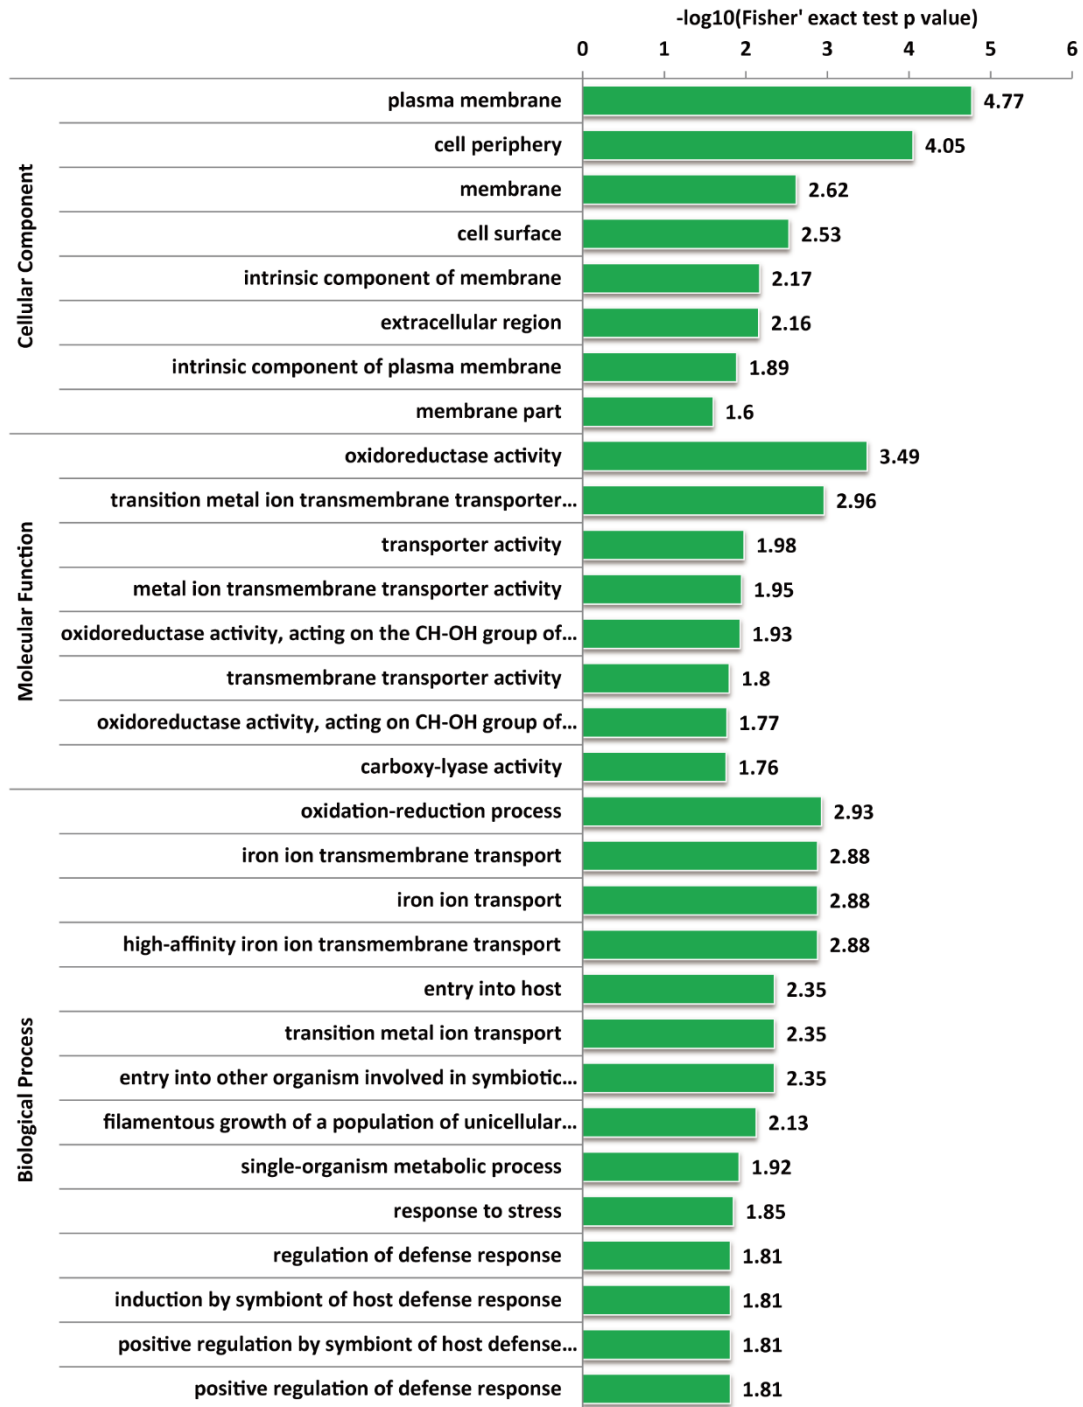

**Fig. S3.** GO-based enrichment analysis of up-regulation (red) and down-regulation (green) expressed proteins. A and B, Q1; C and D, Q2; E and F, Q3; G and H, Q4.

A

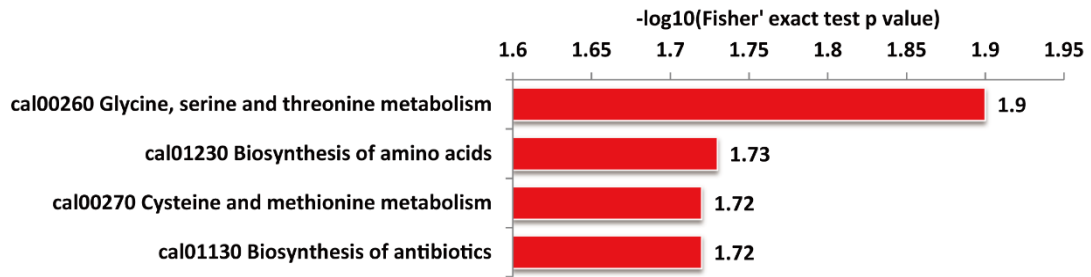

B

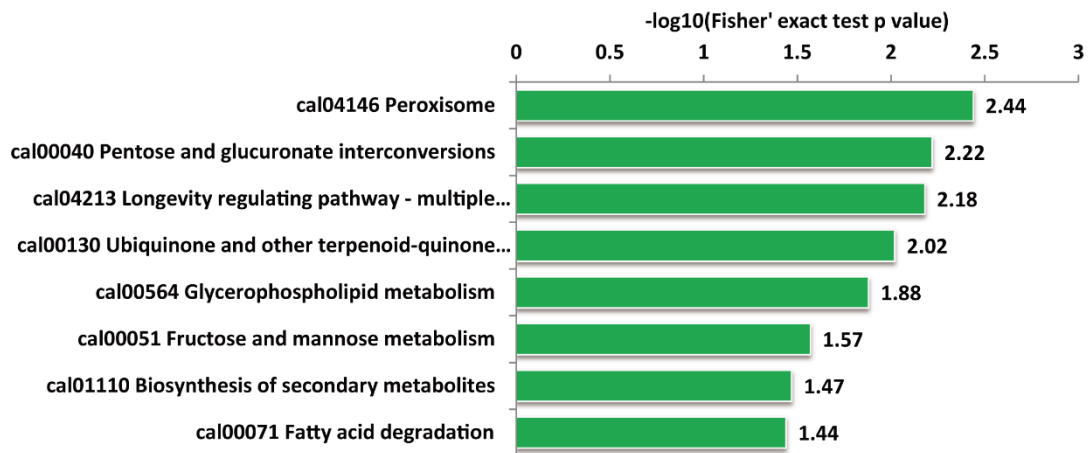

C

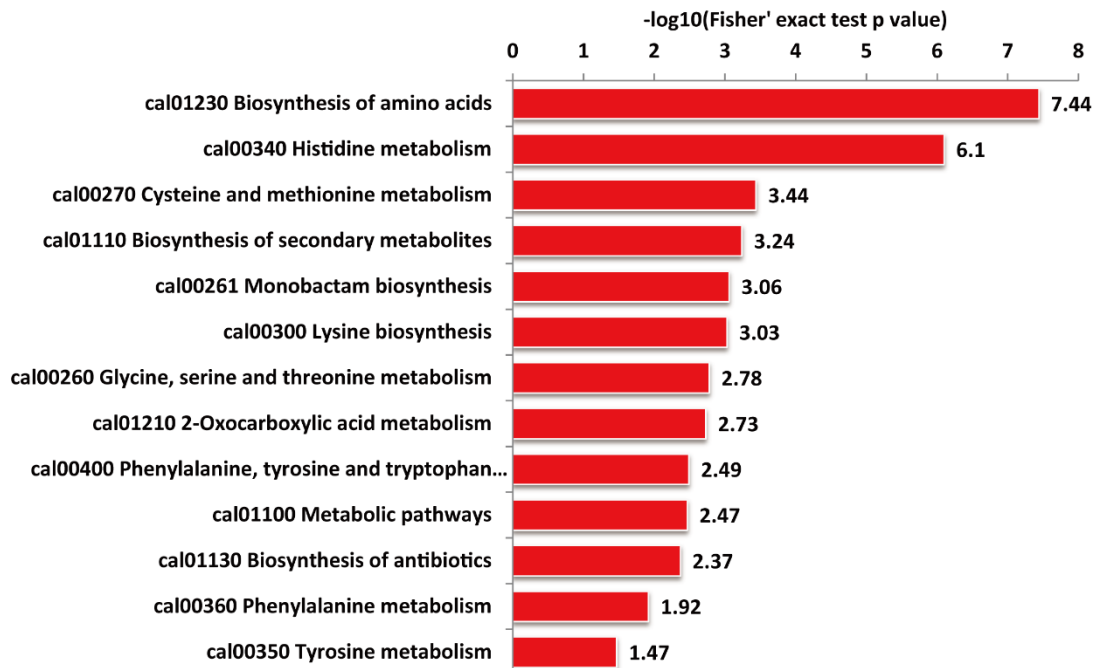

**D**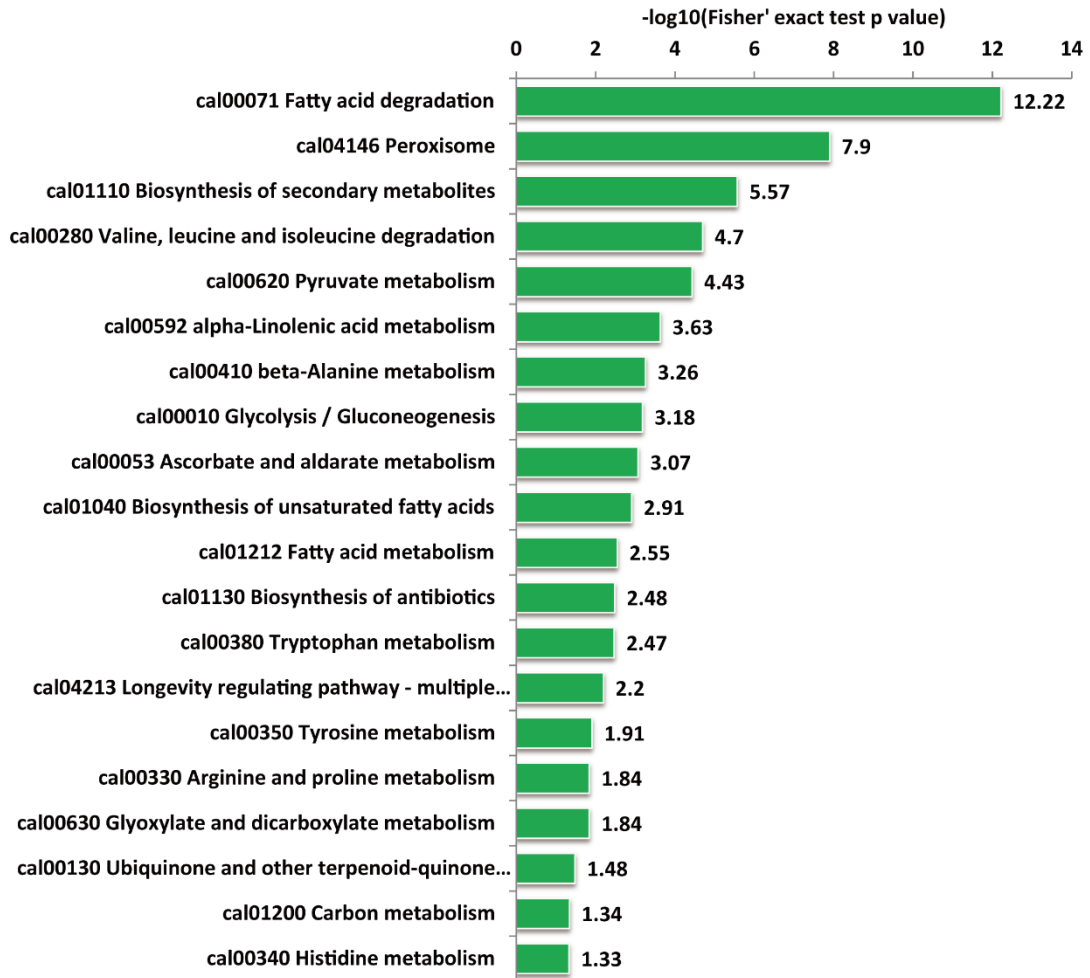**E**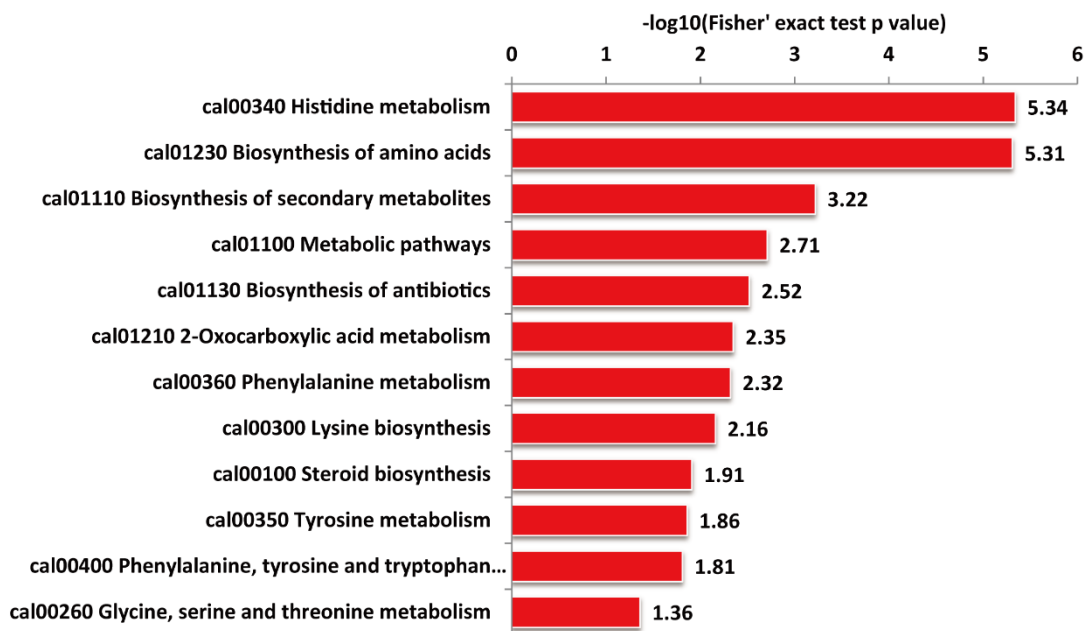

**F**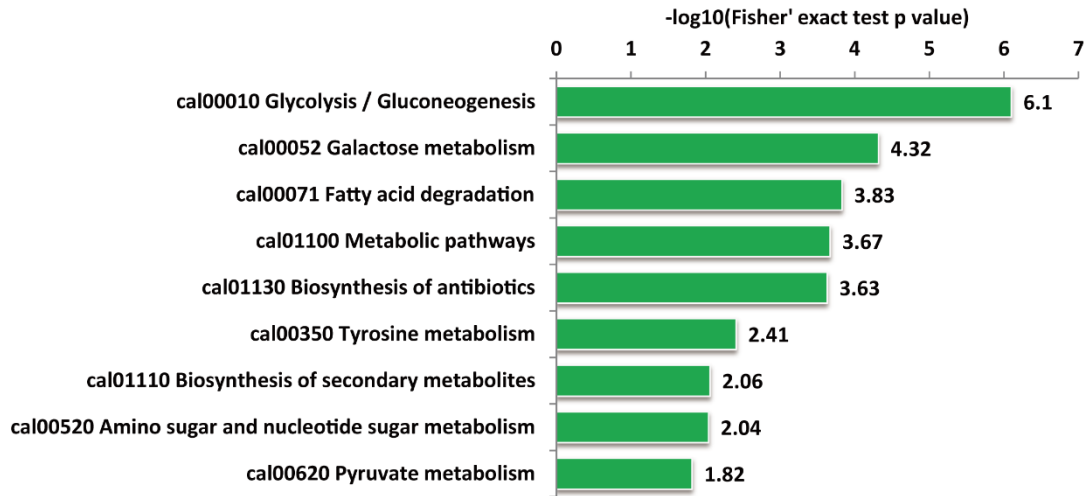**G**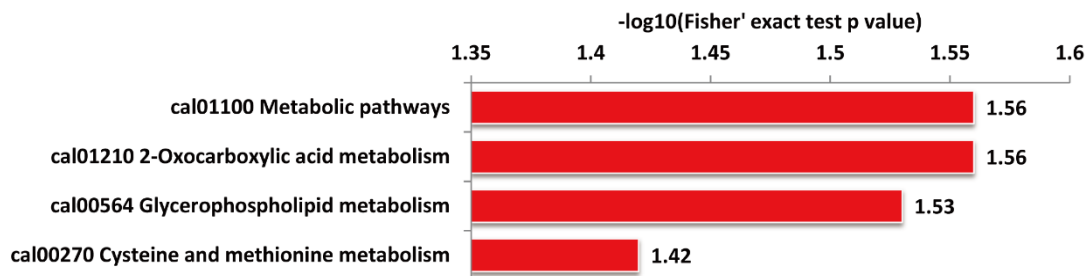**H**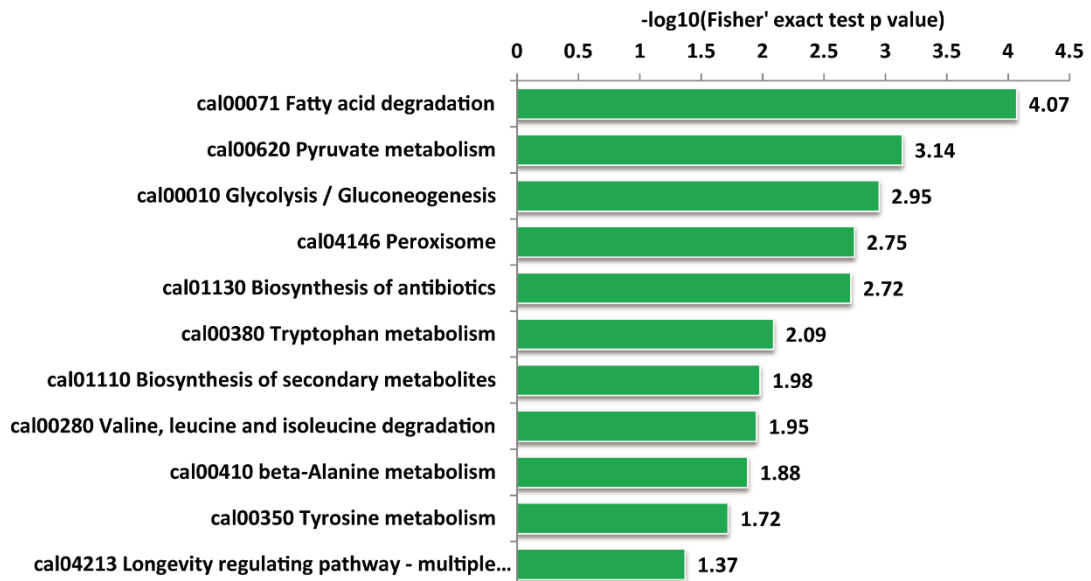

**Fig. S4.** KEGG-based enrichment analysis of up-regulation (red) and down-regulation

(green) expressed proteins. A and B, Q1; C and D, Q2; E and F, Q3; G and H, Q4.

A

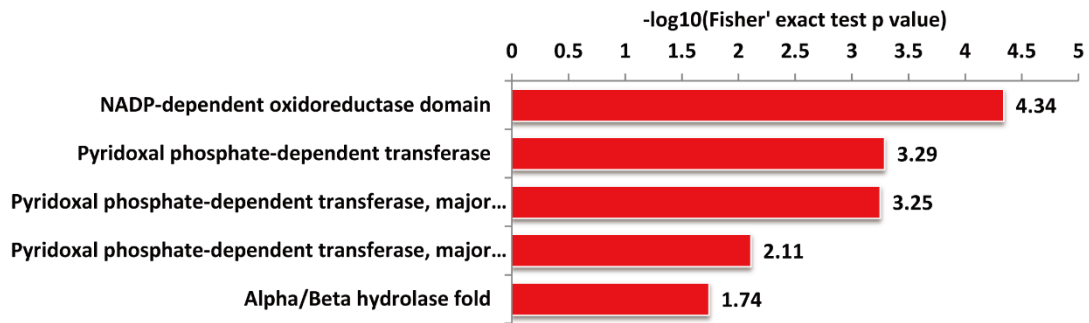

B

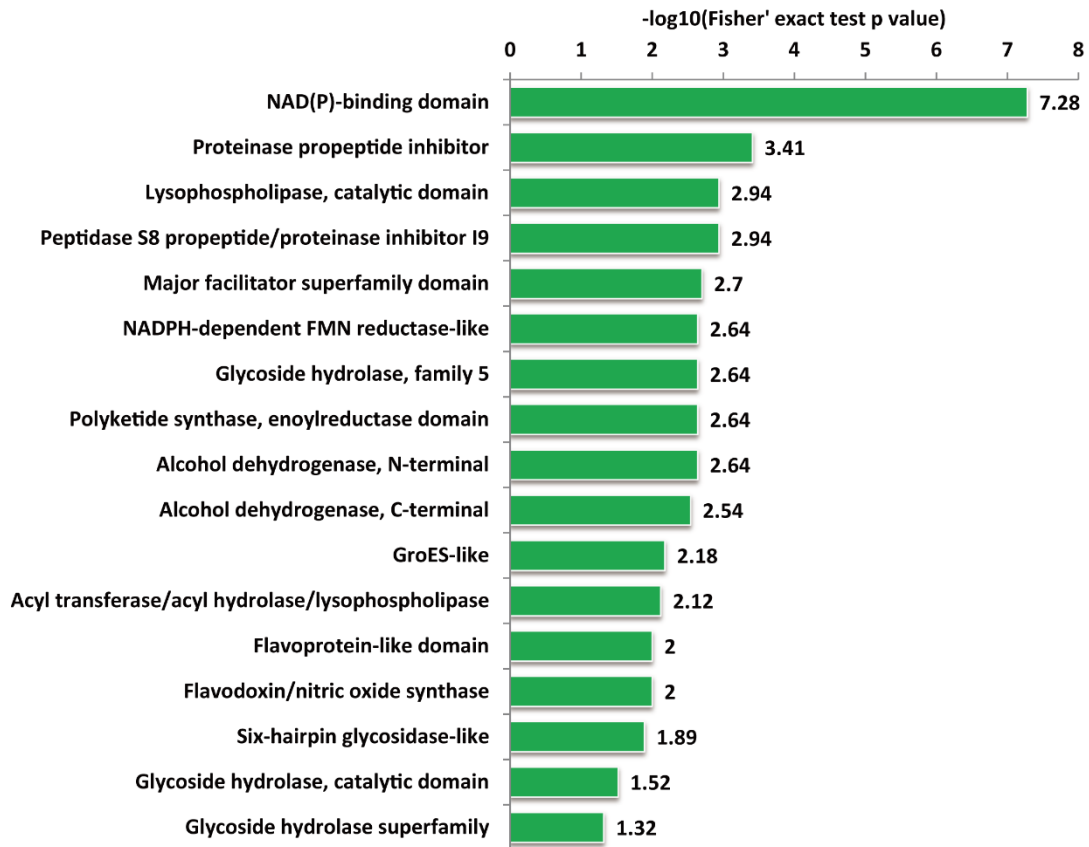

C

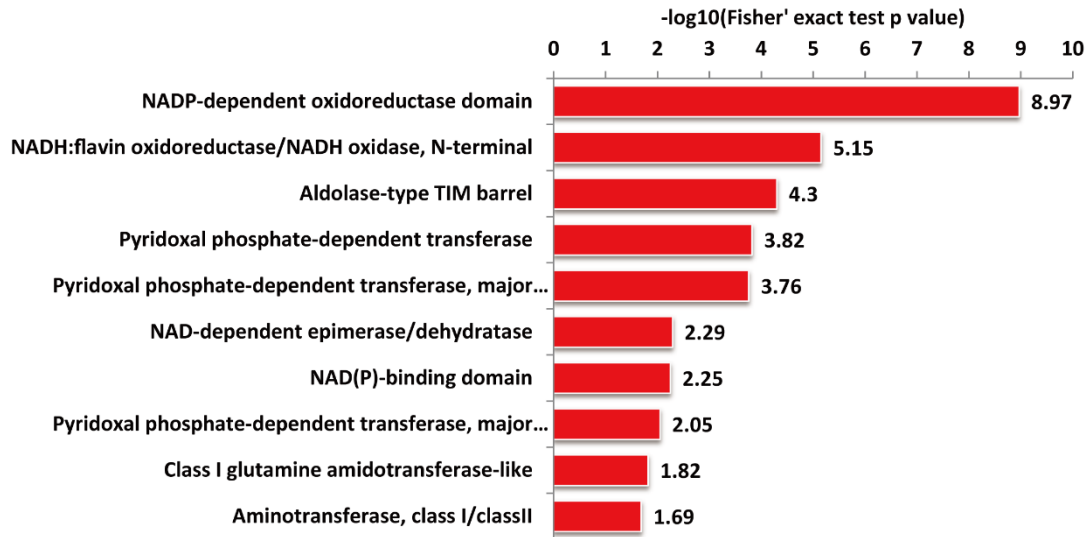

D

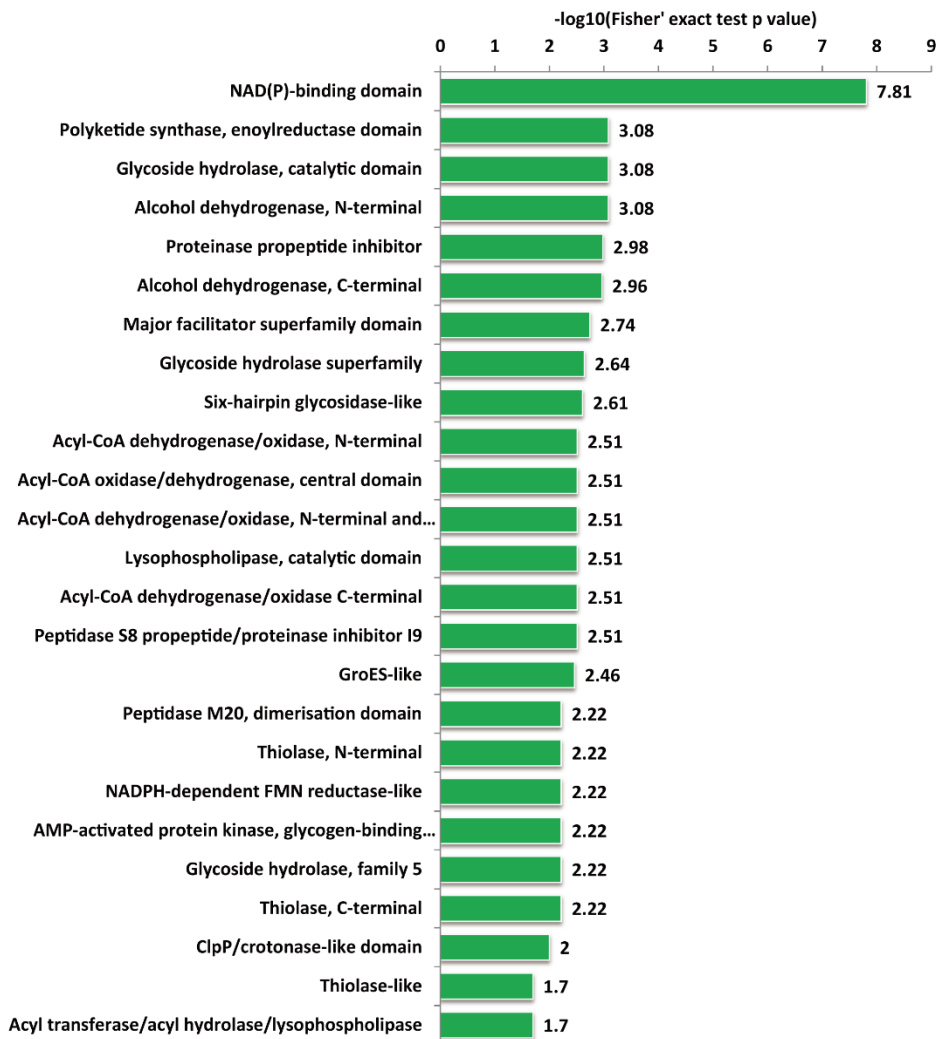

**E**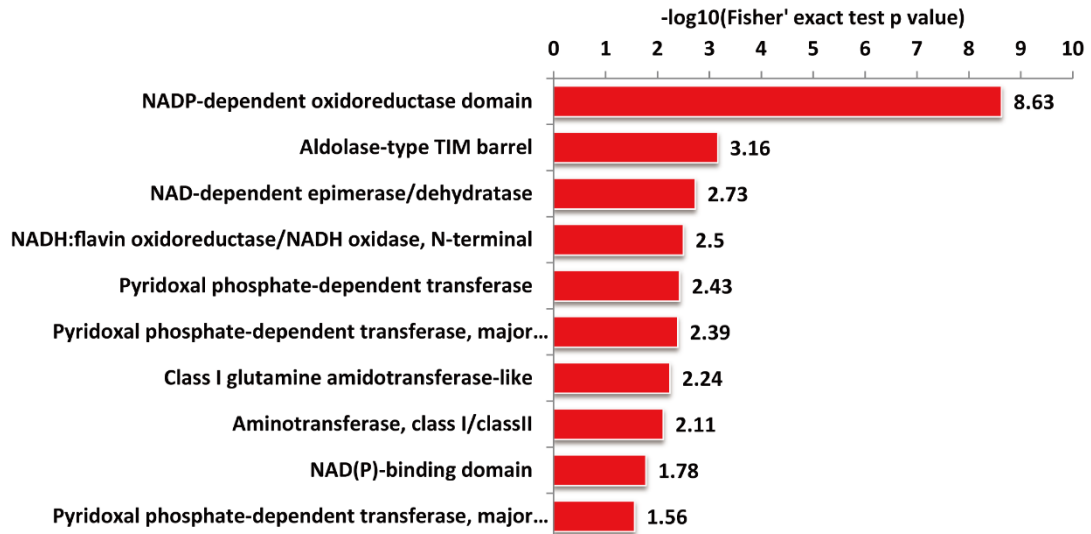**F**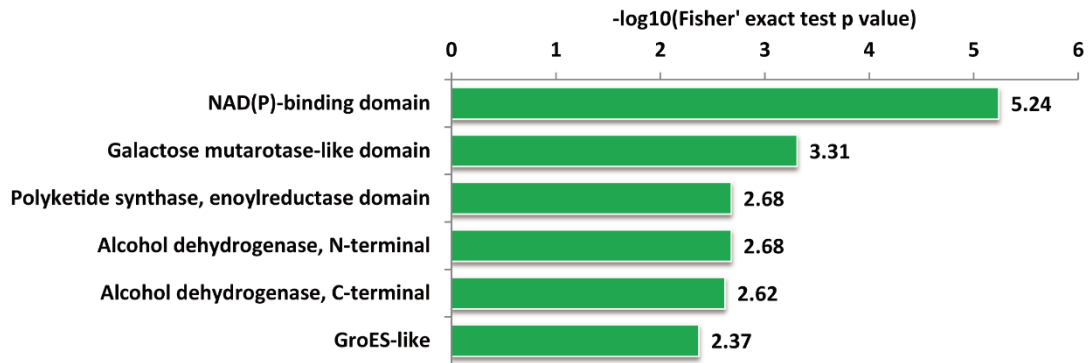**G**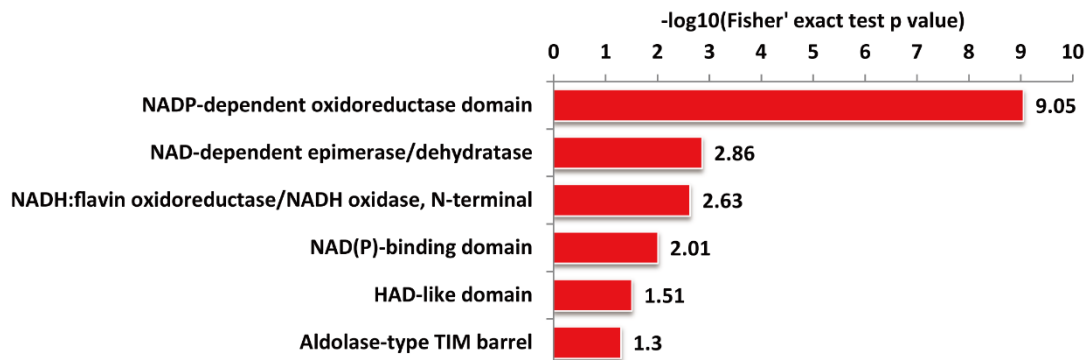

**H**

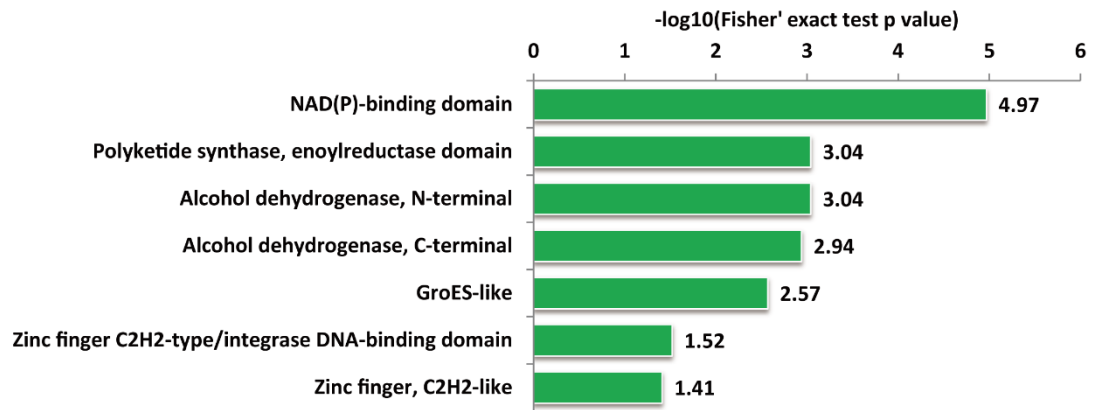

**Fig. S5.** Protein domain-based enrichment analysis of up-regulation (red) and down-regulation (green) expressed proteins. A and B, Q1; C and D, Q2; E and F, Q3; G and H, Q4.
